# Supplementary material
Source: PubMed Central journal article supplement (PMC2650193)
Supplement: supp_2.3-4.178_001065-TableS1.pdf [file supp_2.3-4.178_001065-TableS1.pdf]

**Table S1. Analysis of free energy surrounding experimentally validated *Lmnb1* targets**

| <b><i>Lmnb1</i> 3' UTR</b> | <b>Site 1</b>  | <b>Site 2</b>  | <b>Site 3</b>  |
|----------------------------|----------------|----------------|----------------|
| <i>Mmu-miR-23a</i>         | -16.8 Kcal/mol | -18.7 Kcal/mol | -17.8 Kcal/mol |
| <i>Mmu-miR-23b</i>         | -21.7 Kcal/mol | -18.4 Kcal/mol | -19.0 Kcal/mol |
| 5' 70bp ( $\Delta G$ )     | -10.8 Kcal/mol | -5.8 Kcal/mol  | -7.9 Kcal/mol  |
| 3' 70bp ( $\Delta G$ )     | -5.8 Kcal/mol  | -9.6 Kcal/mol  | -12.6 Kcal/mol |
